# Supplementary material for: Molten salt growth and magnetic properties of octahedral CoFe2O4 crystals: effects of synthesis conditions
Source: Royal Society of Chemistry journal article supplement (doi:10.1039/c1ce05459g), 2011-01-01
Supplement: c1ce05459g.pdf [file c1ce05459g.pdf]

## Supporting Information

# Molten Salt Growth and Magnetic Properties of Octahedral $\text{CoFe}_2\text{O}_4$ Crystals: effects of synthesis conditions

**Guangbin Ji,<sup>\*</sup> Xiaohui Lin,<sup>a</sup> Yanyan Sun,<sup>a</sup> Syed Ahmed Ali Trimizi,<sup>a</sup> Hailin Su,<sup>b</sup>  
Youwei Du<sup>c</sup>**

*College of Material Science and Technology, Nanjing University of Aeronautics and Astronautics,  
Nanjing 210016, P. R. China*

*School of Materials Science and Engineering, Hefei University of Technology, Hefei 230009, P.  
R. China.*

*National Laboratory of Solid State Microstructure and Physics Department of Nanjing University,  
Nanjing 210093, P.R. China.*

<sup>a</sup> Nanjing University of Aeronautics and Astronautics

<sup>b</sup> Hefei University of Technology

<sup>c</sup> Nanjing University

\*E-mail: [gbbj@nuaa.edu.cn](mailto:gbbj@nuaa.edu.cn)

## Experimental Details

### 1. Chemicals

$\text{Co}(\text{Ac})_2 \cdot 4\text{H}_2\text{O}$ ,  $\text{FeCl}_3 \cdot 6\text{H}_2\text{O}$ ,  $\text{NaX}$  ( $\text{X}=\text{F}$ ,  $\text{Cl}$ ,  $\text{Br}$ ),  $\text{Na}_2\text{SO}_4$ ,  $\text{KCl}$ ,  $\text{NaOH}$  and ethanol ( $\text{C}_2\text{H}_5\text{OH}$ ) were purchased from Sinopharm Chemical Reagent Co., All the chemical reagents and solvents are analytical grades and used without further purification. Self-made distilled water was used in the present work.

### 2. Preparation of the $\text{CoFe}_2\text{O}_4$ precursor

For a typical synthesis, 0.1 g/mL  $\text{NaOH}$  was added into a mixture of  $\text{Co}(\text{Ac})_2 \cdot 4\text{H}_2\text{O}$  and  $\text{FeCl}_3 \cdot 6\text{H}_2\text{O}$  solution (mol ratio  $\text{Co}^{2+}:\text{Fe}^{3+}=1:2$ ) slowly to form a  $\text{pH} > 12$  suspension, then the suspension was transferred into a 100 mL Teflon-lined autoclave, sealed and kept statically at  $150\text{ }^\circ\text{C}$  for 4 h, 12 h, 24 h hydrothermal treatment respectively.

### 3. Characterization

Powder X-ray diffraction (XRD) patterns were measured on a Bruker D8 Advance X-Ray diffractionmeter using  $\text{Cu-K}\alpha$  ( $\lambda=1.540562\text{ \AA}$ , 40 kV, 40 mA,) as X -ray source. The scanning electron microscopy images were taken on a HITACHI S-4800 field emitting scanning electron microscope (FESEM). The transmission electron microscopy (TEM) images and selective area electron diffraction (SAED) patterns of the  $\text{CoFe}_2\text{O}_4$  particles were obtained on a JEOL JEM-2100 transmission electron microscope at an acceleration voltage of 200 kV.

Magnetic properties were measured by a Lakeshore Model 7400 series vibrating sample magnetometer (VSM) at room temperature (300 K). **Fourier transform infrared spectra (FTIR) were measured with a Bruker Vertex 70 Spectrophotometer within the wave number range of 4000-360 $\text{cm}^{-1}$  using KBr pressed pellet technique.**

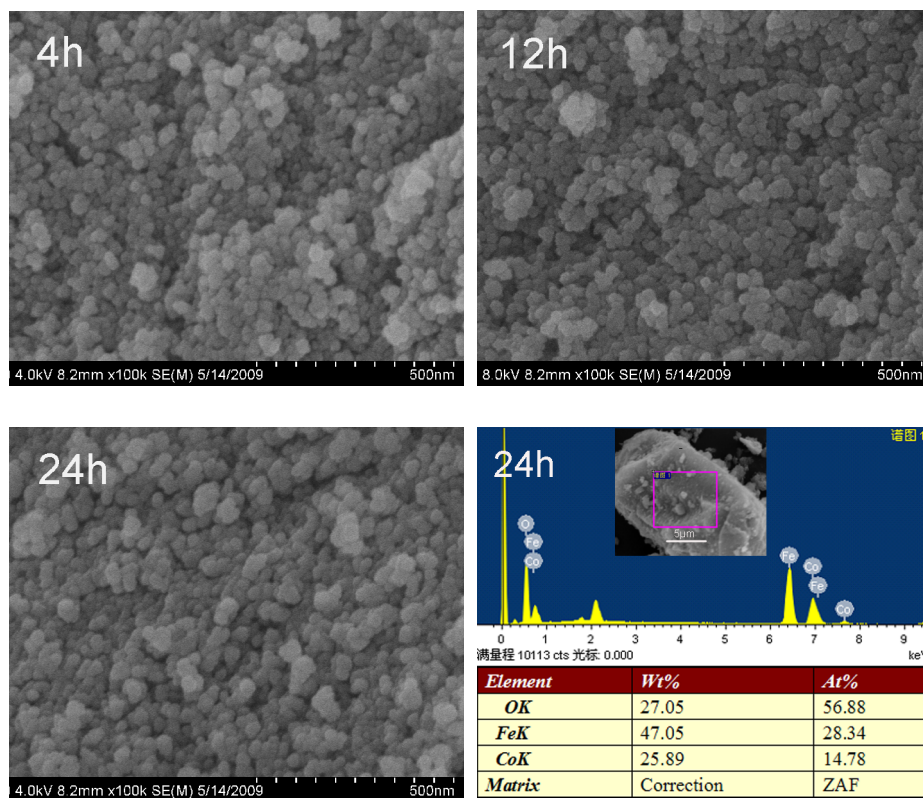

**Figure S1.** SEM and EDX images of precursors with different hydrothermal time.

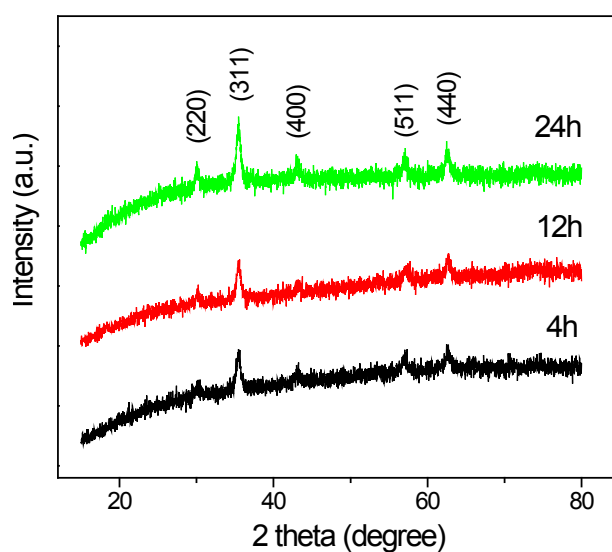

**Figure S2.** XRD patterns of precursors with different hydrothermal time.

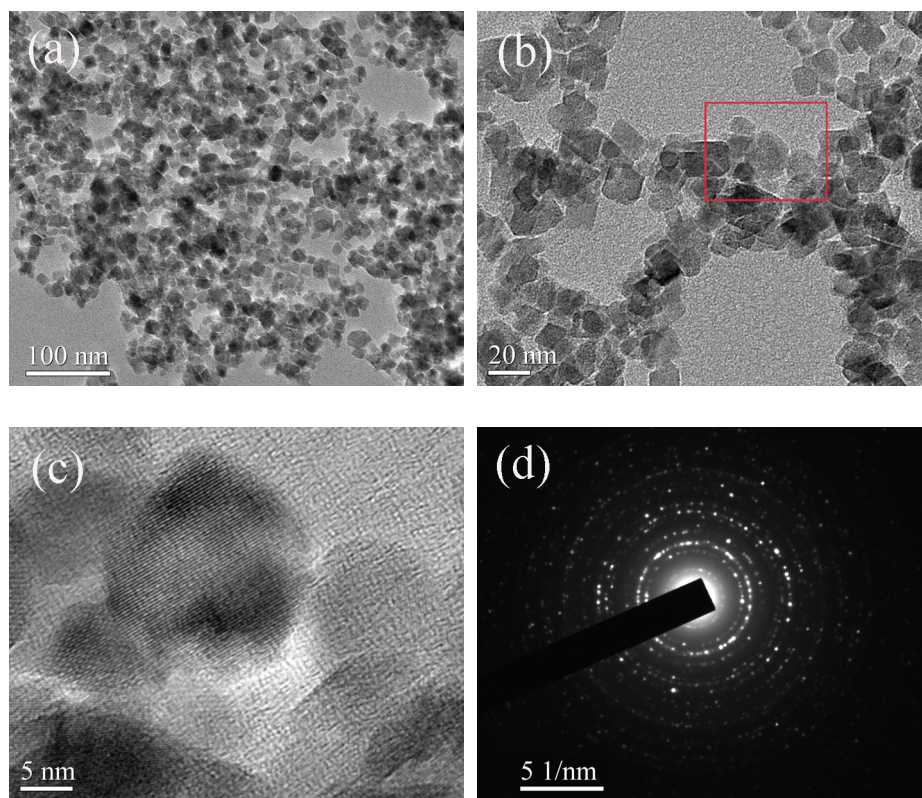

**Figure S3.** TEM (a, b), HR-TEM (c) and SAED (d) images of the precursor prepared through 24 h hydrothermal reaction.

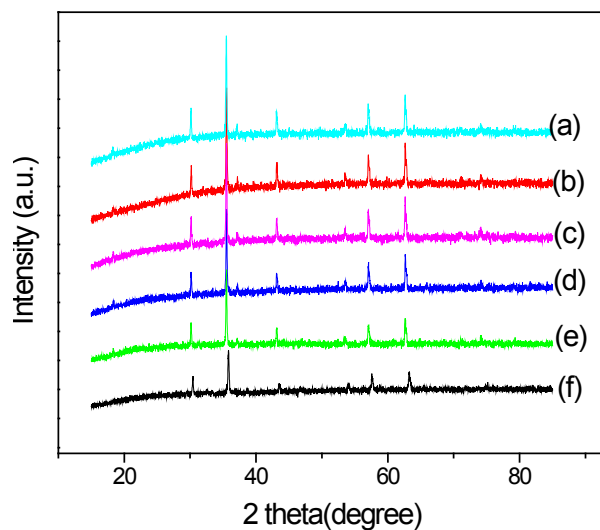

**Fig. S4.** XRD patterns of CoFe<sub>2</sub>O<sub>4</sub> crystals prepared by molten salt growth method using different kinds of salts (a) Na<sub>2</sub>SO<sub>4</sub> (b) NaCl (c) NaCl-KCl (d) NaBr (e) NaCl/Na<sub>2</sub>SO<sub>4</sub> (f) Na<sub>2</sub>CO<sub>3</sub>.

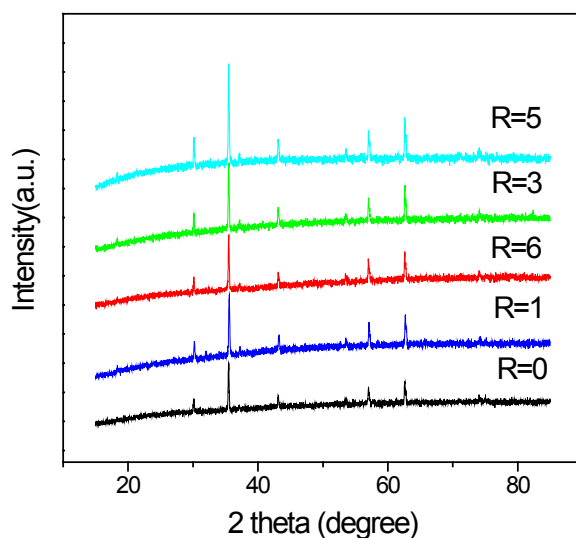

**Fig. S5.** XRD patterns of CoFe<sub>2</sub>O<sub>4</sub> crystals prepared in NaCl/KCl (24 h precursors) with different mass ratio R=0, 1, 3, 5, 6.

**Table S6.** The main magnetic parameters precursor and samples after molten salt reaction

| samples                              | Hc/(Oe) | $\sigma_s$ /(emu/g) | $\sigma_T$ /(emu/g) | $\sigma_T / \sigma_s$ |
|--------------------------------------|---------|---------------------|---------------------|-----------------------|
| P4                                   | 661.51  | 66.97               | 17.59               | 0.263                 |
| P12                                  | 705.20  | 62.61               | 17.71               | 0.283                 |
| P24                                  | 773.80  | 58.60               | 17.55               | 0.299                 |
| MP4                                  | 252.20  | 74.17               | 18.16               | 0.245                 |
| MP12                                 | 248.70  | 75.53               | 19.40               | 0.257                 |
| MP24                                 | 298.60  | 81.06               | 25.41               | 0.313                 |
| MT700                                | 957.07  | 68.44               | 28.47               | 0.416                 |
| MT800                                | 563.29  | 79.17               | 37.98               | 0.480                 |
| MT1000                               | 366.51  | 83.16               | 36.07               | 0.434                 |
| MT0.5                                | 388.50  | 70.11               | 25.89               | 0.369                 |
| MT3                                  | 350.94  | 80.86               | 35.05               | 0.433                 |
| MT5                                  | 366.51  | 83.16               | 36.07               | 0.434                 |
| MR1                                  | 279.70  | 82.90               | 16.40               | 0.198                 |
| MR3                                  | 262.40  | 78.03               | 18.72               | 0.240                 |
| MR5                                  | 298.60  | 81.06               | 25.41               | 0.313                 |
| MR6                                  | 253.20  | 80.68               | 22.96               | 0.285                 |
| MNaF                                 | 323.79  | 35.33               | 12.98               | 0.367                 |
| MNaCl                                | 334.79  | 81.46               | 26.34               | 0.323                 |
| MNaBr                                | 496.06  | 85.40               | 25.93               | 0.304                 |
| MNaCl/KCl                            | 298.60  | 81.06               | 25.41               | 0.313                 |
| MNa <sub>2</sub> SO <sub>4</sub>     | 380.87  | 88.08               | 26.56               | 0.302                 |
| MNaCl/Na <sub>2</sub> O <sub>4</sub> | 349.73  | 71.53               | 21.37               | 0.299                 |

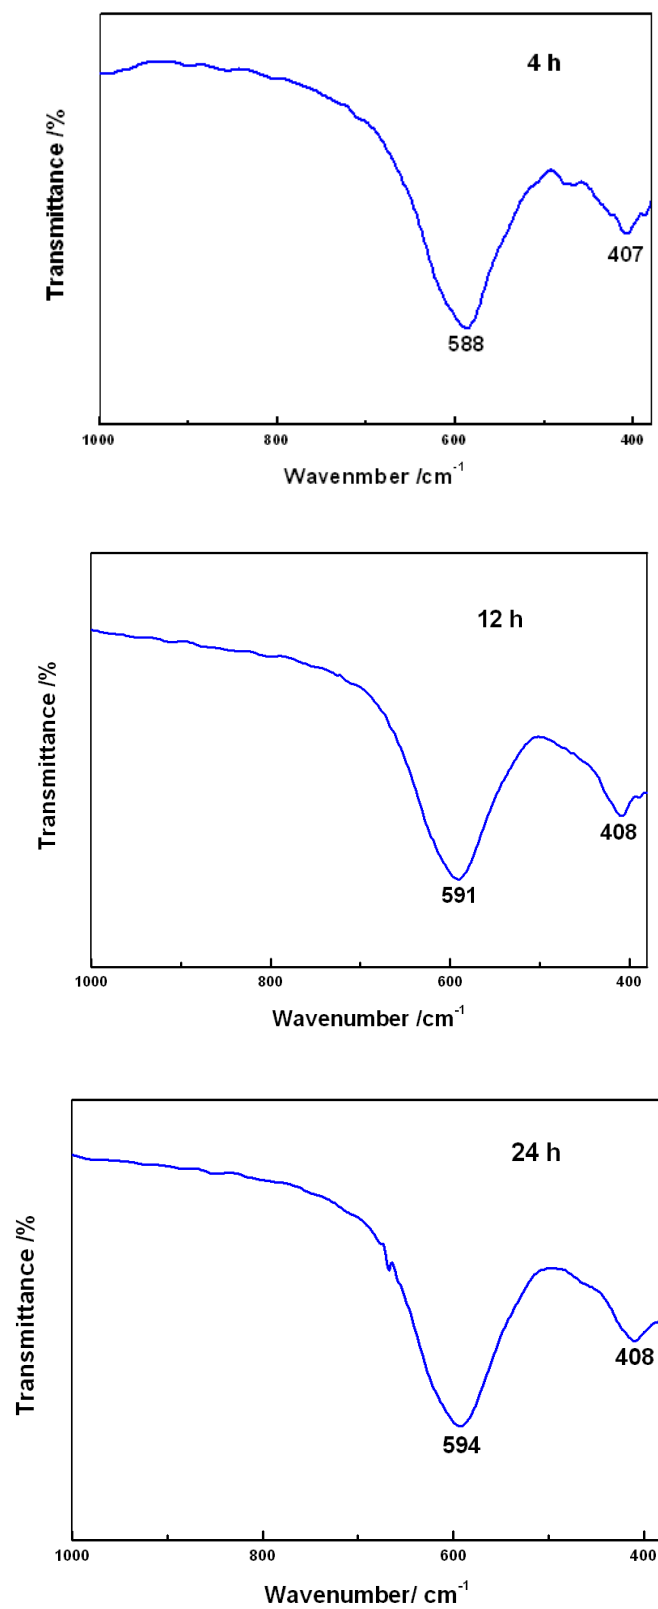

**Fig. S7.** FTIR spectra of precursors with different hydrothermal time.

**Explanatory note:** We probably determine the iron ions contents on A- and B-sites from the FTIR spectra of the precursors (see Fig. S7). The bands at 407 and 408  $\text{cm}^{-1}$  are assigned to the vibration modes of octahedral groups ( $\text{Fe}^{3+}-\text{O}^{2-}$ ), while bands at 588, 591 and 594  $\text{cm}^{-1}$  are due to the stretching vibrations of the tetrahedral groups ( $\text{Fe}^{3+}-\text{O}^{2-}$ ). Compared to the precursor that prepared through 4 h hydrothermal reaction, the band corresponding to A-sites for the precursors that prepared through 12 and 24 h hydrothermal reaction shift to high wave numbers. We all know that the ionic radius of  $\text{Fe}^{3+}$  is smaller than that of  $\text{Co}^{2+}$ , so the content of  $\text{Fe}^{3+}$  ions on A-sites increases with prolonging in hydrothermal time. However, the content of  $\text{Fe}^{3+}$  on B-sites changed slightly because no significant change can be found from the FT-IR. By above FT-IR results, we can estimate the content of  $\text{Fe}^{3+}$  ions on A and B-sites.

Magnetic properties can be evaluated non-quantitatively, because the distribution of metals ions on A- and B-sites decides the magnetic properties of  $\text{CoFe}_2\text{O}_4$ . The total magnetic moment ( $\sigma_s = \sigma_B - \sigma_A$ ) can be calculate by the magnetic moment on the B-sites (octahedral) minus subtract the A-sites (tetrahedral). The hydrothermal time affects directly the cationic distributions on A- and B-sites, from 4 to 24 h, the content of  $\text{Fe}^{3+}$  ions on A-sites increases, resulting in the high  $\sigma_A$ , however,  $\sigma_B$  do not obviously change. We can see that with extending time of hydrothermal treatment,  $\sigma_s$  decreased slightly.
